# Supplementary material
Source: publisher figshare collection journal article supplement (https://tandf.figshare.com/ndownloader/files/18501869)
Supplement: Supplementary file 1 [file 18501869]

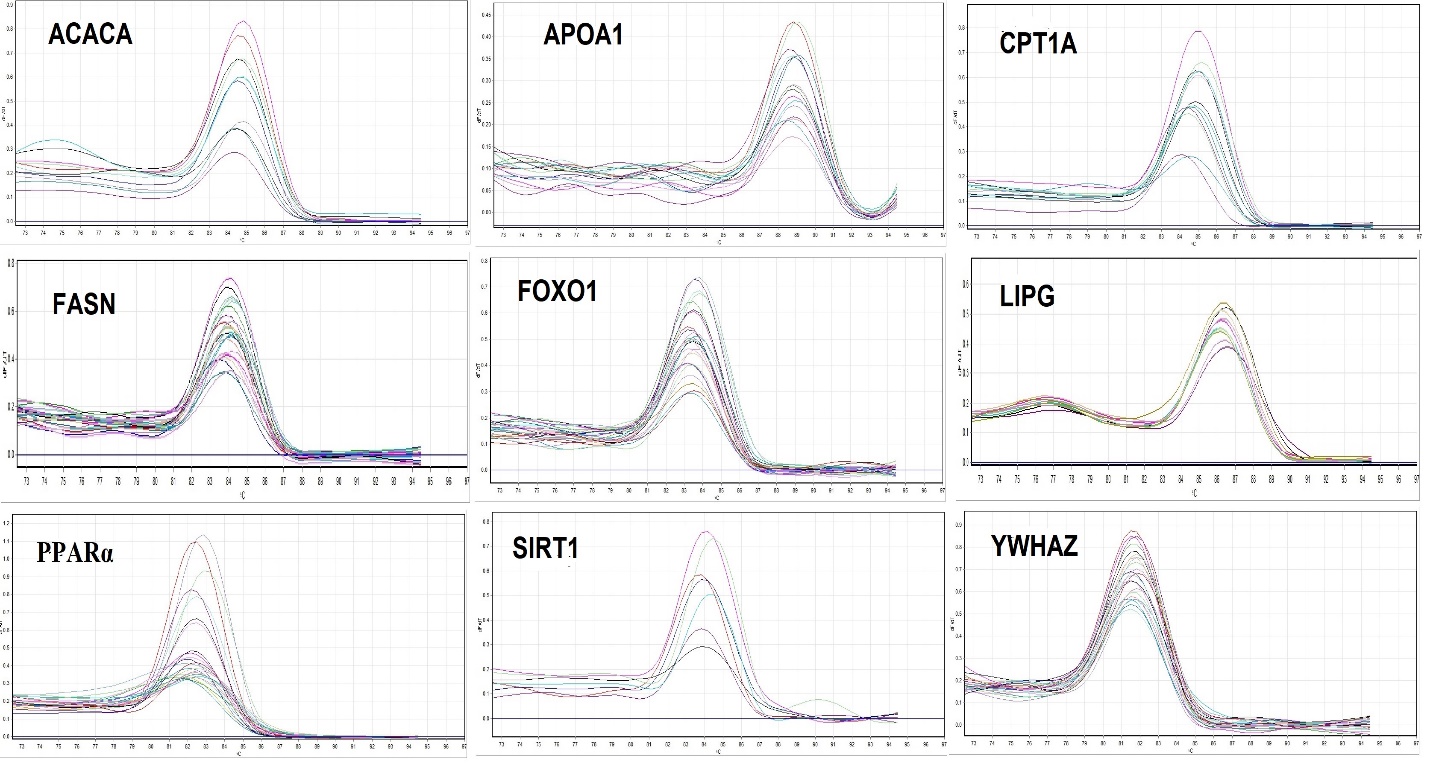


Supplementary Figure 1. Specificity of real time PCR amplification. Melting curves (dissociation curves) of the 8target genes and 1 reference gene (YWHAZ) amplicons after the real time PCR reactions, allshowing one peak. X-axis (horisonatal): temperature (℃); Y-axis (vertical): negative derivative of fluorescence over temperature (-dF/dT).
